# Supplementary material for: Humid heat environment causes anxiety-like disorder via impairing gut microbiota and bile acid metabolism in mice
Source: PubMed Central journal article supplement (PMC11228019; doi:10.1038/s41467-024-49972-w), 2024-07-07
Supplement: 41467_2024_49972_MOESM2_ESM.pdf [file 41467_2024_49972_MOESM2_ESM.pdf]

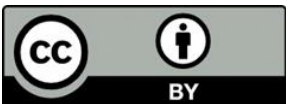

**Open Access** This file is licensed under a Creative Commons Attribution 4.0 International License, which permits use, sharing, adaptation, distribution and reproduction in any medium or format, as long as you give appropriate credit to the original author(s) and the source, provide a link to the Creative Commons license, and indicate if changes were made. In the cases where the authors are anonymous, such as is the case for the reports of anonymous peer reviewers, author attribution should be to 'Anonymous Referee' followed by a clear attribution to the source work. The images or other third party material in this file are included in the article's Creative Commons license, unless indicated otherwise in a credit line to the material. If material is not included in the article's Creative Commons license and your intended use is not permitted by statutory regulation or exceeds the permitted use, you will need to obtain permission directly from the copyright holder. To view a copy of this license, visit <http://creativecommons.org/licenses/by/4.0/>.

## REVIEWER COMMENTS

Reviewer #1 (Remarks to the Author):

The gut microbiota impacts multiple aspects of brain function and behaviour via the gut-brain axis, and microbial metabolites are important conduits of this host-microbe dialogue. The gut microbiota also exhibits substantial compositional and functional plasticity in response to a variety of environmental factors. In this study, the authors evaluate the impact of a humid heat environment (HHE) on behaviour, brain function and relevant microbiota-gut-brain axis signalling pathways. Key observations reported include that HHE-induced compositional alterations in the gut microbiota in an animal model is associated with anxiety-like behaviour, an impact potentially mediated by *Lactobacillus murinus* via impaired bile acid metabolism and enhanced neuroinflammation. Similar observations were recorded in human samples harvested during the humid heat season.

This is an intriguing and very comprehensive study with potentially important translational implications. Notable features include the variety of perspectives from which the hypothesis is evaluated, including the use of FMT and the administration of single bacterial strains. The broad range of behavioural and molecular assessments included is also very impressive. I have the following comments:

(1) I am not entirely convinced about the role of lithocholic acid since it is likely that activation of peripheral inflammatory pathways could also produce similar observations, and the authors report both increases of serum lithocholic acid and increased proinflammatory cytokines in the serum in both the animal and humans. It would be important to either demonstrate that there is also an increase in CNS concentrations of this bile acid, or to demonstrate that it is responsible for the barrier function disruption underpinning the neuroinflammatory phenotype.

(2) Germ-free animals are markedly altered at multiple levels of the gut-brain axis, including many of the behavioural and molecular features reported here. It is thus difficult to parse the impact of the HHE-associated microbiota-induced disruption from such underlying neurodevelopmental consequences of growing up with a gut microbiota. An alternative model of microbiota-disruption, such as FMT following antibiotic-induced knockdown, would be necessary to validate the claims made here.

(3) Additional detail is required for the processing of samples for the faecal transplantation study. Were these samples processed in anaerobic conditions and from fresh or frozen samples for example? I refer the authors to the GRAFT guidelines for additional experimental details that should

be reported (Guidelines for reporting on animal fecal transplantation (GRAFT) studies: recommendations from a systematic review of murine transplantation protocols <https://doi.org/10.1080/19490976.2021.1979878>).

(4) The details provided for the processing of the microbiota sequencing is very limited. What databases and bioinformatic pipelines were used?

(5) The term 'Gut flora' is obsolete, please use gut microbiota throughout the manuscript.

Reviewer #2 (Remarks to the Author):

In this manuscript, "Humid heat environment causes anxiety-like disorder through impairing gut microbiota and bile acid metabolism," the authors attempted to elucidate the potential mechanisms by which humid heat environments can cause anxiety disorders. They found a decrease in intestinal *L. murinus* bacteria and an increase in blood lithocholic acid in mice exposed to a humid heat environment and proposed that these could be inflammation-caused in the brain, resulting in anxiety, in a fecal transplantation and *L. murinus* supplementation experiment. This is a very interesting study, but several issues should be addressed to strengthen the paper.

1. The lack of behavioral abnormalities in heat-exposed female animals is a very important result. Did changes in the microbiome occur? Confirmation of the author's findings of reduced *L. murinus* and elevated lithocholic acid should be required.

2. Could the denaturation of the diet by humid heat treatment have affected the food intake, body growth, and gut microbiota of the mice? The preference of mice for humid heat-treated food and its effect on gut microbiome needs to be investigated.

3. How did the authors determine that *L. murinus* was the key bacterium? Could other *L. reuteri* and *Akkermansia* be recovered from behavioral abnormalities in a humid heat environment? A more detailed analysis of the gut microbiota is needed after supplementation of *L. murinus* bacteria. Are there increases in *L. reuteri* and *Akkermansia*?

4. Similarly, why did they conclude that lithocholic acid is key among the bile acid components?

5. Where do they think the inflammatory cytokines in the blood come from? As lithocholic acid causes liver damage, could damage in the liver be the origin of inflammation? Has the liver been examined?

6. Or do they believe that lithocholic acid disrupts the intestinal or brain barrier? The authors would like to present the mechanisms they envisage, from elevated blood lithocholic acid to elevated inflammatory cytokines in the blood and inflammation in the brain.

7. Although it is understood that the source of lithocholic acid is in the gut and that *L. murinus* are responsible for lithocholic acid synthesis, the mechanism for the inverse correlation between blood and fecal lithocholic acid in Fig 6 is not understood. If barrier disruption is the only reason, then all other metabolites would also increase in blood. The mechanism by which secondary bile acid metabolites, including lithocholic acid, characteristically increase in blood needs to be discussed.

1 Manuscript ID number

2 NCOMMS-23-54798-T

3 We sincerely thank the editor and all reviewers for their valuable feedback that we have  
4 used to improve the quality of our manuscript. The reviewer comments are laid out  
5 below in italicized font and specific concerns have been numbered. Our response is  
6 given in normal font and changes/additions to manuscript are given in the blue text.

7

## 8    **RESPONSE TO REVIEWERS' COMMENTS**

9    The two reviewers raised a number of constructive criticisms and suggestions. To  
10   fully address them, we performed additional experiments as well as implementing  
11   considerable changes to the manuscript. As a result, we believe the manuscript is  
12   much stronger. We wish to take this opportunity to thank the reviewers for their  
13   valuable input. Below, we summarize the reviewers' comments, and describe point-  
14   by-point how we have addressed them.

### 15   **Reviewer 1**

16    ●   *The gut microbiota impacts multiple aspects of brain function and behaviour via  
17   the gut-brain axis, and microbial metabolites are important conduits of this host-  
18   microbe dialogue. The gut microbiota also exhibits substantial compositional and  
19   functional plasticity in response to a variety of environmental factors. In this study,  
20   the authors evaluate the impact of a humid heat environment (HHE) on behaviour,  
21   brain function and relevant microbiota-gut-brain axis signalling pathways. Key  
22   observations reported include that HHE-induced compositional alterations in the gut  
23   microbiota in an animal model is associated with anxiety-like behaviour, an impact  
24   potentially mediated by *Lactobacillus murinus* via impaired bile acid metabolism and  
25   enhanced neuroinflammation. Similar observations were recorded in human  
26   samples harvested during the humid heat season. This is an intriguing and very  
27   comprehensive study with potentially important translational implications. Notable  
28   features include the variety of perspectives from which the hypothesis is evaluated,  
29   including the use of FMT and the administration of single bacterial strains. The  
30   broad range of behavioural and molecular assessments included is also very  
31   impressive.*

32    [Response:](#) Many thanks for the reviewer's positive comments. We tried our best to  
33   improve our manuscript according to your constructive comments.

34 ● *Point 1: I am not entirely convinced about the role of lithocholic acid since it is*  
35 *likely that activation of peripheral inflammatory pathways could also produce similar*  
36 *observations, and the authors report both increases of serum lithocholic acid and*  
37 *increased proinflammatory cytokines in the serum in both the animal and humans.*  
38 *It would be important to either demonstrate that there is also an increase in CNS*  
39 *concentrations of this bile acid, or to demonstrate that it is responsible for the barrier*  
40 *function disruption underpinning the neuroinflammatory phenotype.*

41 **Response:** According to the reviewer's comments, we provided the additional  
42 information in the revision as below: Firstly, we measured the concentration of  
43 lithocholic acid (LCA) in the brain in the NC and HHE groups, showing a significant  
44 increase in the HHE group compared to the NC group (new Extended Data Fig. 5).  
45 These additional results have been added to the revision (Result section: Page 8, Line  
46 154) and are also shown as below.

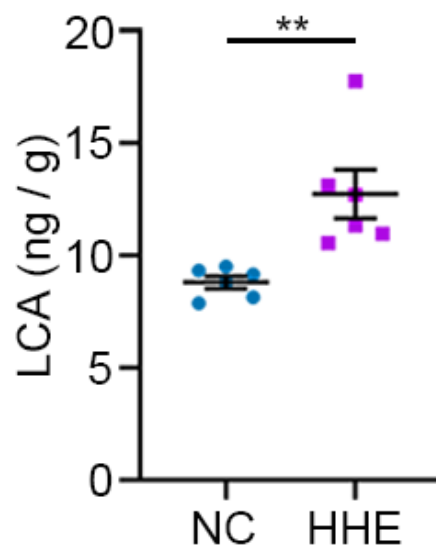

47

48 **Extended Data Fig 5. The level of Lithocholic acid increased in the brain.**

49 LCA concentration measured by targeted mass spectrometry in the brain showed a  
50 significant increase in the HHE group compared to the NC group. \*\*,  $P < 0.01$ ; Student's  
51 *t*-test;  $n = 6$  mice/group.

52

53 Secondly, to test the impact of LCA on the BBB permeability and neuroinflammation,  
 54 mice in the NC group were subjected to vein injection of LCA or saline for 7  
 55 consecutive days, and we then analyzed the expression levels of the inflammatory  
 56 factors and tight junction proteins (ZO-1, claudin-1 and occludin-1) in the brain (new  
 57 Extended Data Fig. 12a). The results showed that LCA treatment significantly increased  
 58 the expression of TNF- $\alpha$  and IL-6 (new Extended Data Fig. 12b) and downregulated  
 59 the tight junction proteins (new Extended Data Fig. 14c) compared to the mice treated  
 60 by saline. The results suggest that LCA is responsible for the BBB disruption and  
 61 neuroinflammation. These additional results have been added to the revision (Result  
 62 section: Page 12, Line 273-279) and are also shown as below. We briefly discussed the  
 63 potential mechanisms in the revision (Discussion section: Page 17, Line 430-438)

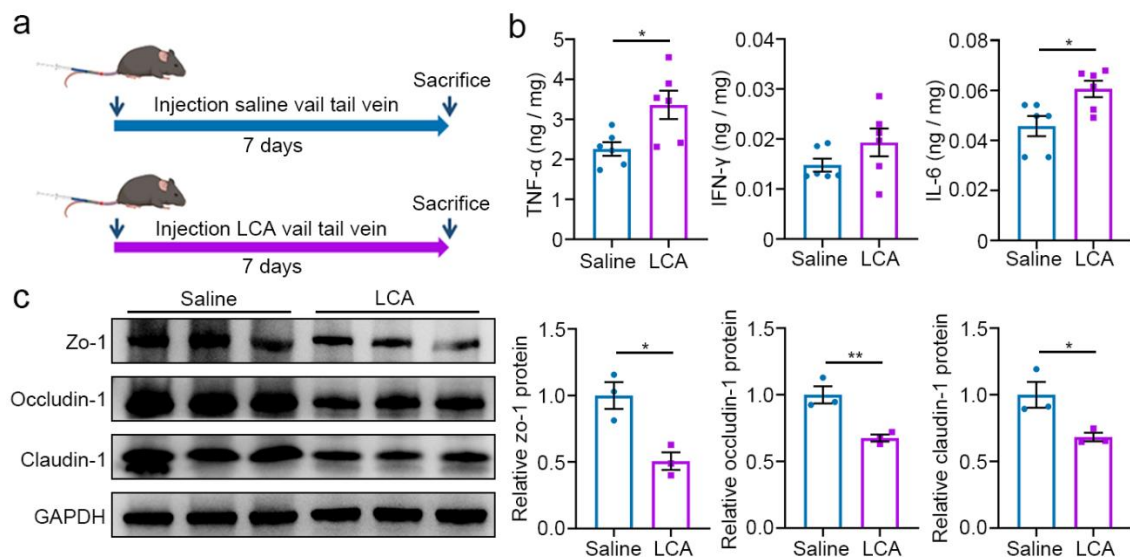

64

65 **Extended Data Fig 12. Increased lithocholic acid impairs the BBB impermeability**  
 66 **and promotes neuroinflammation in mice.**

67 **a** Illustration of the experimental outflow. **b** Mice received vein injection of LCA for 7  
 68 days showed an increase of TNF- $\alpha$  and IL-6 detected by ELISA in the brain compared  
 69 to the mice treated by saline. **c** Western blots showed a significant decrease of junction  
 70 proteins including claudin-1, occludin-1 and ZO-1 in the cortical samples in the mice  
 71 treated by LCA compared to those treated by saline. \*,  $P < 0.05$ ; \*\*,  $P < 0.01$ ; Student's  
 72 *t*-test; n=6 mice/group for ELISA and mass spectrometry, and n=3 mice/group for



73 Western blots.

74

75 ● ***Point 2: Germ-free animals are markedly altered at multiple levels of the gut-***  
76 ***brain axis, including many of the behavioural and molecular features reported***  
77 ***here. It is thus difficult to parse the impact of the HHE-associated microbiota-***  
78 ***induced disruption from such underlying neurodevelopmental consequences of***  
79 ***growing up with a gut microbiota. An alternative model of microbiota-disruption,***  
80 ***such as FMT following antibiotic-induced knockdown, would be necessary to***  
81 ***validate the claims made here.***

82

83 **Response:** Thank the reviewer. We tested the impact of FMT using the microbiota-  
84 depleted mice, and the phenotypes in the HHE group was recapitulated as well (please  
85 see new Extended Data Fig. 10). Briefly, mice were treated by an antibiotic cocktail  
86 (ampicillin, 0.25 mg/mL; neomycin, 0.25 mg/mL; metronidazole, 0.25 mg/mL;  
87 vancomycin, 0.125 mg/mL) to deplete the microbiota as described before<sup>1</sup> and then  
88 underwent FMT from either the NC group or HHE group. Mice received FMT from the  
89 HHE group showed the downregulation of tight junction proteins (new Extended Data  
90 Fig. 10a), anxiety-like behaviors (new Extended Data Fig. 10b), excitability increase of  
91 pyramidal neurons in the cortex (new Extended Data Fig. 10c, d), the upregulation of  
92 phosphorylated PI3K and AKT and increase of NF-kB in the brain (new Extended Data  
93 Fig. 10e). These additional results have been added to the revision (Result section: Page  
94 10, Line 216-222) and are shown as below.

95

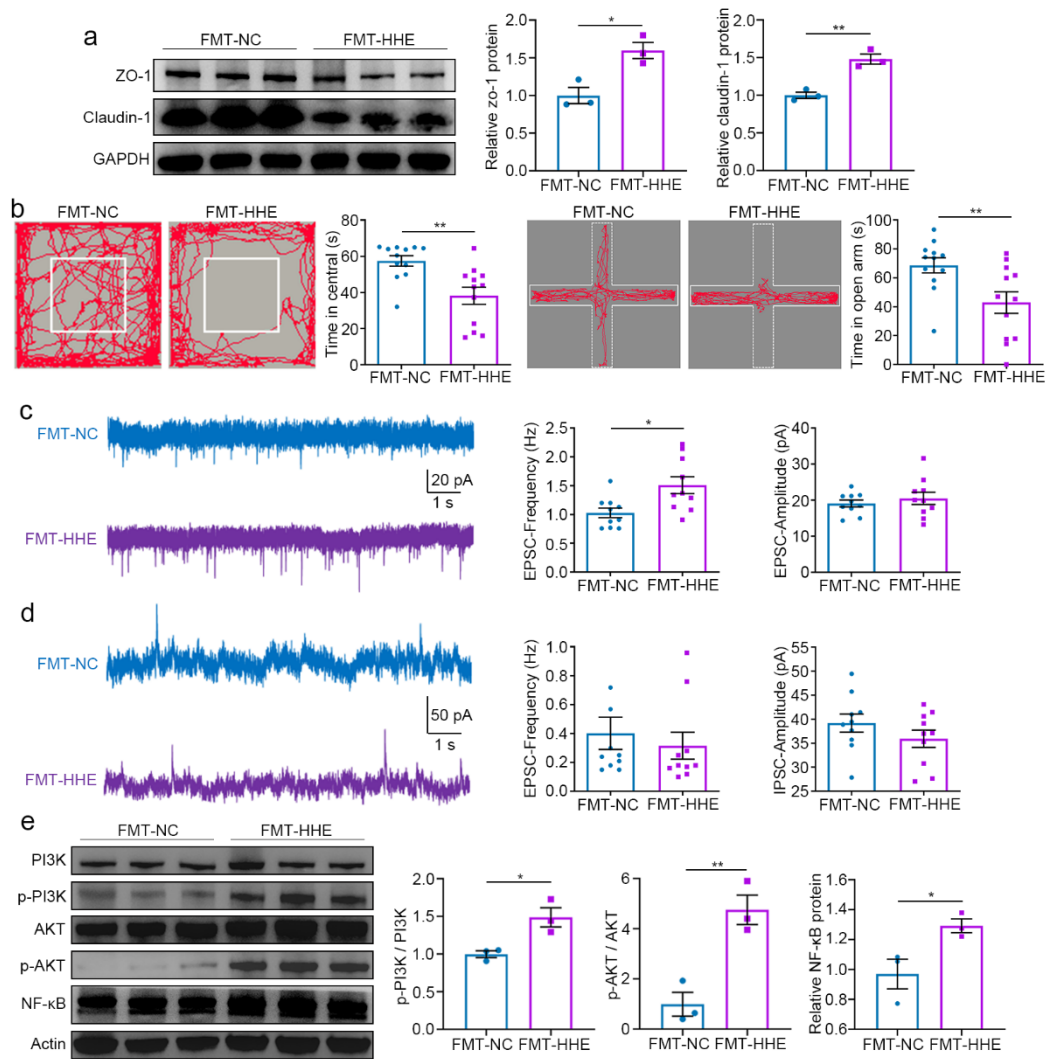

96

97 **Extended Data Fig. 10. HHE mice-derived FMT results in microbiota-depleted**  
 98 **mouse recapitulating the phenotypes observed in the HHE group.**

99 Mice were treated by an antibiotic cocktail to deplete gut microbiota and then  
 100 underwent FMT from the HHE group or the NC group, which were short for the FMT-  
 101 HHE group or the FMT-NC group respectively. **a** Western blots of colon samples  
 102 showed a significant increase of claudin-1 and ZO-1 in the FMT-HHE group compared  
 103 to the FMT-NC group (n = 3 mice/group). **b** The time of travelling the central zone in  
 104 the open-field test and staying close arms of elevated plus maze was significantly  
 105 increased in the FMT-HHE group compared to the FMT-NC group (n=12 mice/group).  
 106 **c, d** Electrophysiological recordings in mouse acute brain slices showed a significant  
 107 frequency decrease of pyramidal neuron sEPSC, but no differences of sEPSC amplitude,  
 108 in the FMT-HHE group compared to the FMT-NC group (**c**). There were no differences

109 of sIPSC recordings in two groups (**d**). Total 10 neurons in each recording and 3 mice  
110 in each group. **e** Western blots of cortical samples showed a significant decrease of  
111 phosphorylated PI3K and AKT1, total NF- $\kappa$ B proteins in the FMT-HHE group  
112 compared to the FMT-NC group. \*,  $P < 0.05$ ; \*\*,  $P < 0.01$ ; Student's  $t$ -test;  $n = 3$   
113 mice/group.

114

115 ● **Point 3: Additional detail is required for the processing of samples for the**  
116 **faecal transplantation study. Were these samples processed in anaerobic**  
117 **conditions and from fresh or frozen samples for example? I refer the authors to**  
118 **the GRAFT guidelines for additional experimental details that should be reported**  
119 **(Guidelines for reporting on animal fecal transplantation (GRAFT) studies:**  
120 **recommendations from a systematic review of murine transplantation protocols**  
121 **<https://doi.org/10.1080/19490976.2021.1979878>).**

122

123 **Response:** Thanks. In the revision, we provided additional details (Methods section:  
124 Page 21, Line 537-546) of the sample processing for the faecal transplantation study  
125 referred to the guidelines for reporting on animal fecal transplantation (GRAFT) studies.

126

127 ● **Point 4: The details provided for the processing of the microbiota sequencing**  
128 **is very limited. What databases and bioinformatic pipelines were used?**

129

130 **Response:** Thanks. The details have been added in the revision (Methods section; Page  
131 19, Line 485-506). Detailed as follow: Paired-end reads was assigned to samples based  
132 on their unique barcode and truncated by cutting off the barcode and primer sequence.  
133 Paired-end reads were merged using FLASH (v1.2.11,  
134 <http://ccb.jhu.edu/software/FLASH/>), a very fast and accurate analysis tool, which was  
135 designed to merge paired-end reads when at least some of the reads overlap the read

136 generated from the opposite end of the same DNA fragment, and the splicing sequences  
137 were called raw tags. Quality filtering on the raw tags were performed under specific  
138 filtering conditions to obtain the high-quality clean tags according to the QIIME  
139 (V1.9.1, [http://qiime.org/scripts/split\\_libraries\\_fastq.html](http://qiime.org/scripts/split_libraries_fastq.html)) quality control process. The  
140 tags were compared with the reference database (Silva database [https://www.arb-  
141 silva.de/](https://www.arb-silva.de/)) and using UCHIME Algorithm  
142 ([http://www.drive5.com/usearch/manual/uchime\\_algo.html](http://www.drive5.com/usearch/manual/uchime_algo.html)) to detect chimera  
143 sequences, and then the chimera sequences were removed. Then the Effective Tags  
144 finally obtained. Sequences analysis were performed by Uparse software (Uparse  
145 v7.0.1001, <http://drive5.com/uparse/>). Sequences with ff97% similarity were assigned  
146 to the same OTUs. Representative sequence for each OTU was screened for further  
147 annotation. Amplicon sequence variant (ASV) were analysed by Deblur, which uses  
148 error profiles to obtain putative error-free sequences from Illumina MiSeq and HiSeq  
149 sequencing platforms. In order to study phylogenetic relationship of different OTUs,  
150 and the difference of the dominant species in different samples (groups), multiple  
151 sequence alignment was conducted using the MAFFT (v7.490,  
152 <https://mafft.cbrc.jp/alignment/software/>). OTUs abundance information were  
153 normalized using a standard of sequence number corresponding to the sample with the  
154 least sequences. Subsequent analysis of alpha diversity and beta diversity were all  
155 performed basing on this output normalized data.

156

157 ● ***Point 5: The term ‘Gut flora’ is obsolete, please use gut microbiota throughout***  
158 ***the manuscript.***

159

160 **Response:** Thank you for the suggestion. In the revision, “gut flora” has been replaced  
161 by “gut microbiota”.

162

163 **Reviewer 2**

164 ● *In this manuscript, “Humid heat environment causes anxiety-like disorder*  
165 *through impairing gut microbiota and bile acid metabolism,” the authors attempted*  
166 *to elucidate the potential mechanisms by which humid heat environments can cause*  
167 *anxiety disorders. They found a decrease in intestinal L. murinus bacteria and an*  
168 *increase in blood lithocholic acid in mice exposed to a humid heat environment and*  
169 *proposed that these could be inflammation-caused in the brain, resulting in anxiety,*  
170 *in a fecal transplantation and L. murinus supplementation experiment. This is a very*  
171 *interesting study, but several issues should be addressed to strengthen the paper.*

172

173 **Response:** We are very grateful for your constructive and helpful comments.

174

175 ● *Point 1: The lack of behavioral abnormalities in heat-exposed female animals*  
176 *is a very important result. Did changes in the microbiome occur? Confirmation of*  
177 *the author's findings of reduced L. murinus and elevated lithocholic acid should*  
178 *be required.*

179

180 **Response:** Thank the reviewer for this important comment. We collected the faecal  
181 samples from female mice and performed 16S rRNA gene sequencing. Although the  
182 clustering of gut microbiota was different in the NC and HHE groups (Attached Fig.  
183 1a), the abundance of *L. murinus* showed no significant differences between two groups  
184 (Attached Fig. 1b). In addition, we compared the expression of LCA in the female mice  
185 between the NC and HHE groups and found that serum LCA was significantly  
186 decreased in the HHE group compared to the NC group (Attached Fig. 1c). The finding  
187 is different from the observation in the male mice in which the abundance of *L. murinus*  
188 was significantly decreased and LCA was significantly increased in the HHE group.  
189 Thus, humid heat environment imposes different effect on the gut microbiota and

190 metabolism in males and female mice, and the potential mechanisms are required for  
191 further study in the future. In the work, we focused on the study using male mice. As  
192 suggested by the Editor, we changed our title as ‘Humid heat environment causes  
193 anxiety-like disorder through impairing gut microbiota and bile acid metabolism in  
194 male mice’, and the related explanation was also provided in the text.

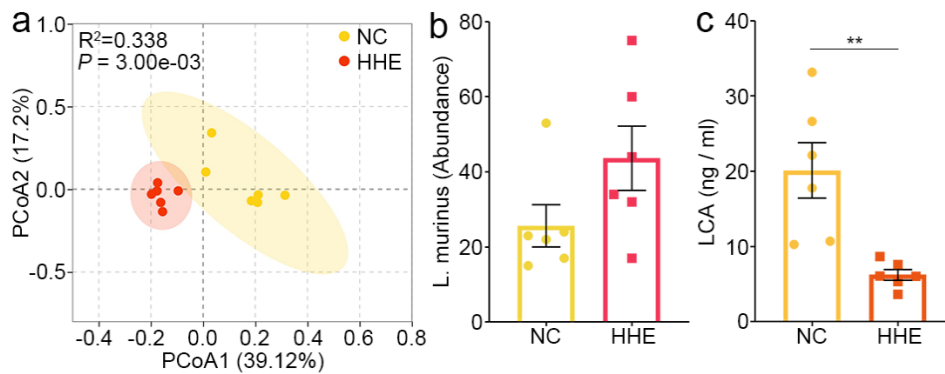

195

196 **Attached Fig. 1. Impact of humid heat environment on gut microbiota and serum**

197 **LCA in female mice.** Female mouse faecal samples were collected from the HHE and

198 NC groups for 16S rRNA sequencing, showing the significant differences of microbial

199 composition in the PCoA (beta diversity) (a), and the abundance of *L. murinus* was

200 comparable in the HHE and NC groups (b). LCA concentration in serum of female mice

201 was significantly decreased in the HHE group compared to the NC group (c). \*\*,

202  $P<0.01$ ; Student's *t*-test;  $n=6$  mice/group.

203

204 ● **Point 2: Could the denaturation of the diet by humid heat treatment have**  
205 **affected the food intake, body growth, and gut microbiota of the mice? The**  
206 **preference of mice for humid heat-treated food and its effect on gut microbiome**  
207 **needs to be investigated.**

208

209 **Response:** Thanks for this important comment. Actually, we replaced the mice with  
210 fresh food every 3 days to avoid the denaturation of the diet caused by humid heat  
211 treatment. We performed additional experiments to confirm whether the diet exposed

212 in the humid heat environment for 3 days impose an effect on mouse food intake, body  
213 growth, and gut microbiota. Mice received humid heat environment-exposed diet (The  
214 HHD group) or normal diet (the ND group) for 4 weeks, and mouse weight and food  
215 intake were monitored every week showing no differences in the ND and HHD groups  
216 (Attached Fig. 2a, b). At 4 weeks, 16S rRNA gene sequencing of mouse faecal samples  
217 showed that the microbiome composition was comparable in the ND and HHD groups  
218 (Attached Fig. 2c). Thus, the diet is not one important cause to account for the  
219 phenotypes observed in the HHE group.

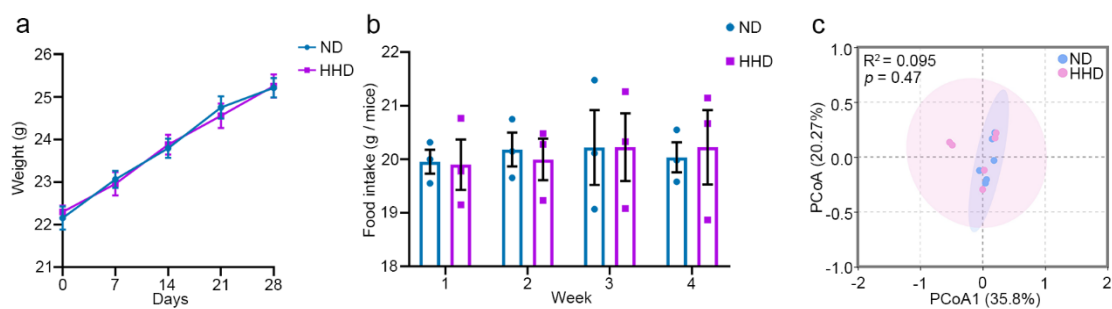

220

221 **Attached Fig. 2. The diet is not the cause of the phenotypes observed in the HHE**  
222 **group.** Mice received humid heat environment-exposed diet (The HHD group) or  
223 normal diet (the ND group) for 4 weeks. There were no differences of their weight (a)  
224 and food intake (b) in two groups. N = 3 cages per group, 6 mice per cage, two-way  
225 repeated ANOVA followed by Bonferroni's multiple comparisons. In addition, the  
226 microbial composition showed comparable in the ND and HDD groups (c; n=6  
227 mice/group).

228

229 ● **Point 3: How did the authors determine that was the key bacterium? Could**  
230 **other *L. reuteri* and *Akkermansia* be recovered from behavioral abnormalities in**  
231 **a humid heat environment? A more detailed analysis of the gut microbiota is**  
232 **needed after supplementation of *L. murinus* bacteria. Are there increases in *L.***  
233 ***reuteri* and *Akkermansia*?**

234

235 **Response:** Thank the reviewer. We supposed that *L. murinus* was the key bacterium  
236 to account for the phenotypes in the HHE group, and this conclusion was supported  
237 by the following information. (i) Among ten altered bacterial groups, the decrease of  
238 *L. murinus* was most significant in the HHE group compared to the NC group (Fig.  
239 2f). (ii) Ecological network interaction analysis showed that the reduction of *L.*  
240 *murinus* was synergistically associated with the reduction of protective bacteria (e.g.,  
241 *L. reuteri*), and that *L. murinus* was the dominant species that dominates interactions  
242 and interacted closely with other protective bacteria (Fig. 2g). (iii) The reduction of *L.*  
243 *murinus* abundance was also identified in the GF mice received FMT from the mice in  
244 the HHE group and the human subjects in the humid heat season (Fig. 3d, Extended  
245 Data Fig. 6d). (iv) *L. murinus* administration reversed mouse abnormalities in the  
246 HHE group. (v) Our finding was also in line with the previous reports: *L. murinus*  
247 significantly alleviated the anxiety like behaviors<sup>2</sup> and possessed the ability to modify  
248 bile acids<sup>3</sup>.

249 We agree with the reviewer that other altered bacteria might be also involved in the  
250 abnormalities observed in the HHE group. To test this, we performed the additional  
251 experiments. HHE-treated mice were subjected to the administration of *L. murinus*, *L.*  
252 *reuteri* (the HHE+*L. reuteri* group), *Akkermansia muciniphila* (the HHE+ Akk group),  
253 or saline (the HHE+S group). In the open-field test, the time that mice travelled the  
254 central area was increased in the HHE+L, HHE+*L. reuteri* group, but not in the  
255 HHE+Akk group, compared with HHE+S group (new Extended Data Fig. 14a). In the  
256 elevated plus maze, the time spent in the open arms was increased in the HHE+L  
257 group, HHE+*L. reuteri* group and HHE+Akk group (new Extended Data Fig. 14b).  
258 However, *L. murinus* treatment induced most significant behavioral improvements.  
259 The results have been added to the revision (Result section: Page 13, Line 312-324)  
260 and are shown as below.



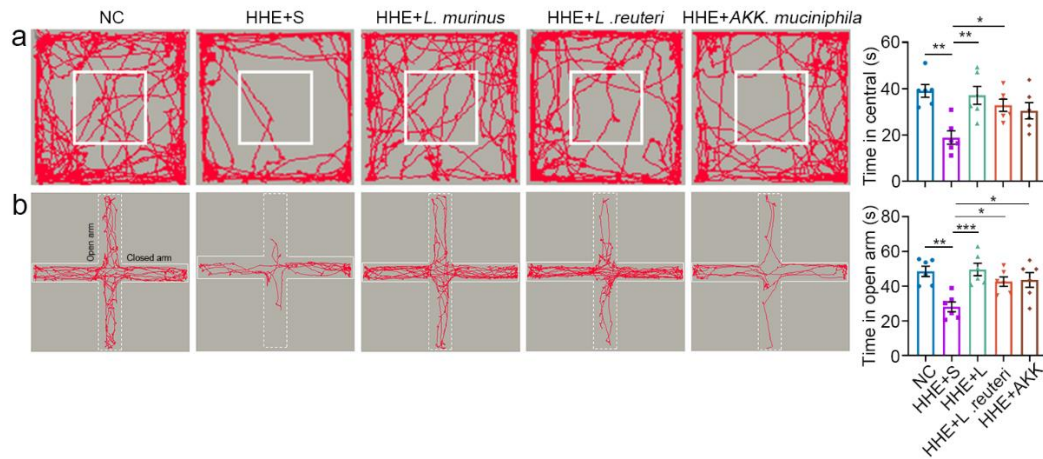

261

262 **Extended Data Fig. 14. *L. murinus* have the better improvement for HHE-induced**  
 263 **anxiety disorder compared to *L. reuteri* and *Akkermansia muciniphila*.** **a, b** There  
 264 was a significant increase of travelling the central zone of the open field and staying  
 265 open arms of elevated plus maze in the both HHE+L group and HHE+*L. reuteri* group  
 266 compared to the HHE+S group. HHE+Akk group spent more time stay open arms of  
 267 elevated plus maze compared to the HHE+S group. n=6 mice/group; \*,  $P<0.05$ ; \*\*,  $P<0.01$ ;  
 268 \*\*\*,  $P<0.001$ ; one-way ANOVA and Tukey's multiple comparisons test.

269

270 We also collected the faecal samples from the HHE+L and HHE+S groups and  
 271 performed 16S rRNA gene sequencing. In the HHE+L group (treated with *L.*  
 272 *murinus*), the gut microbiota composition in beta diversity was significantly different  
 273 from that in the HHE+S group (treated by saline) (new Extended Data Fig. 15a). The  
 274 abundance of *L. murinus* and *L. reuteri*, but not of *Akkermansia muciniphila*, was  
 275 significantly increased in the HHE+L group compared to the NC group (new  
 276 Extended Data Fig. 15b). These results have been added to the revision (Result  
 277 section: Page 14, Line 327-333) and are shown as below.

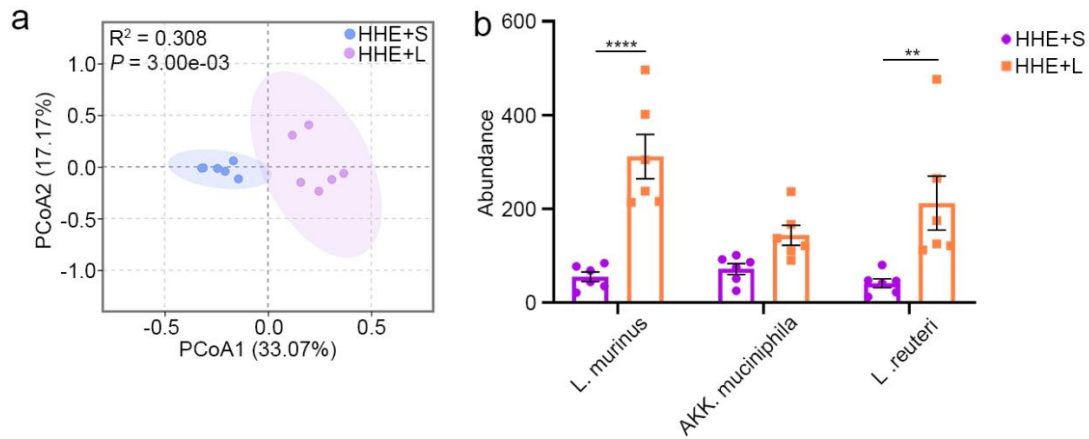

278

279 **Extended Data Fig. 15. *L. murinus* treatment alters the gut microbiota in the**  
 280 **HHE group.** Mice in the HHE group were treated with *L. murinus* (the HHE+L  
 281 group ) or saline (The HHE+S group), and their faecal samples were collected for 16S  
 282 rRNA gene sequencing. **a** Unweighted UniFrac distance-based analysis showed the  
 283 significant differences of microbial composition in the PCoA (beta diversity) in two  
 284 groups. **b** The abundance of *L. murinus* and *L. reuteri*, but not of *Akkermansia*  
 285 *muciniphila* was significantly increased in the HHE+L group compared to the HHE+S  
 286 group. \*\*,  $P < 0.01$ ; \*\*\*\*,  $P < 0.0001$ ; Student's *t*-test;  $n = 6$  mice/group.

287

288 ● **Point 4: Similarly, why did they conclude that lithocholic acid is key among**  
 289 **the bile acid components?**

290

291 **Response:** Thanks for the reviewer's question, and the related question was also  
 292 mentioned by the first reviewer. Our detailed response is as follows: (i) Among the  
 293 altered secondary bile acids in the HHE group (Fig. 2j), lithocholic acid (LCA) showed  
 294 the highest toxicity<sup>4</sup> and was known to be closely associated with anxiety disorders<sup>5</sup>.  
 295 (ii) The concentration of serum LCA was negatively correlated with the abundance of  
 296 *L. murinus* in faecal sample (Fig. 2l). (iii) Our FMT experiment demonstrated that gut  
 297 microbiota from the HHE group caused the elevation of serum LCA using germ-free  
 298 mice (Fig. 3g). Upregulation of serum LCA was also identified in the human subjects

299 during humid heat season and accompanied with the decrease of *L. murinus* abundance  
300 in the faecal samples (Fig. 8d, e). (iii) Our additional experiments as described above  
301 showed that LCA was significantly increased in the brain in the HHE group compared  
302 with the NC group, and that LCA treatment caused the permeability increase of the  
303 BBB and neuroinflammation (new Extended Data Fig. 12 a-c). The additional results  
304 have been added to the revision (Result section: Page 12, Line 273-279).

305

306 ● **Point 5: Where do they think the inflammatory cytokines in the blood come**  
307 **from? As lithocholic acid causes liver damage, could damage in the liver be the**  
308 **origin of inflammation? Has the liver been examined?**

309

310 **Response:** To answer the reviewer's question, we did H&E staining of liver sections  
311 and detected the expression of TNF- $\alpha$  and IL-6 in liver samples from the HHE and NC  
312 groups. We found numerous vacuoles (red arrows) indicating lipid deposition and  
313 elevated pro-inflammatory cytokines (TNF- $\alpha$  and IL-6) in the HHE group compared  
314 with the NC group (new Extended Data Fig. 13a, b). The result indicates that the  
315 damaged liver may be one origin of the inflammatory cytokines in the HHE group.  
316 These results have been added to the revision (Result section: Page 12, Line 279-284)  
317 and are shown as below.

318

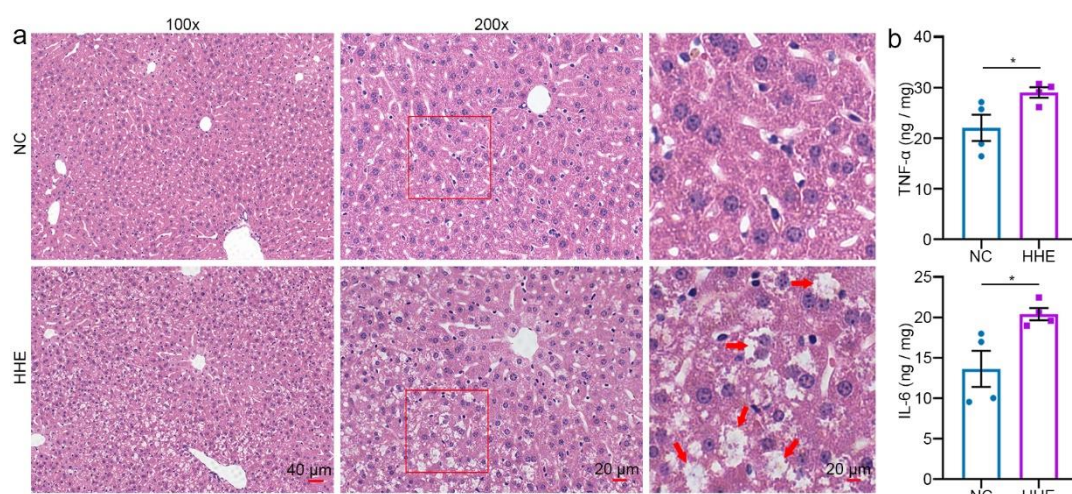

319 **Extended Data Fig. 13. HHE induces mouse liver damage and inflammatory**  
320 **cytokine secretion.**

321 **a.** H&E staining showed lipid deposition (red arrows) in the HHE group but rarely in  
322 the NC group. **b.** ELISA of liver samples showed a significant increase of TNF- $\alpha$  and  
323 IL-6 in the HHE group compared to the NC group. \*,  $P < 0.05$ ; Student's  $t$ -test;  $n = 4$   
324 mice/group.

325

326 ● ***Point 6: Or do they believe that lithocholic acid disrupts the intestinal or brain***  
327 ***barrier? The authors would like to present the mechanisms they envisage, from***  
328 ***elevated blood lithocholic acid to elevated inflammatory cytokines in the blood***  
329 ***and inflammation in the brain.***

330

331 **Response:** We agree with the reviewer that LCA may disrupt the brain and/or intestinal  
332 barrier. Our additional experiment as described above demonstrated that LCA treatment  
333 resulted in downregulation of junction proteins (ZO-1, Occludin-1 and Claudin-1) and  
334 upregulation of pro-inflammatory cytokines (TNF- $\alpha$  and IL-6) in the brain (new  
335 Extended Data Fig. 12). In addition, mice in the HHE group treated by colestyramine  
336 (a bile acid binding resin) to reduce bile acid accumulation in the blood showed a  
337 significant decrease of inflammatory factors (TNF- $\alpha$  and IL-6) in the serum and brain  
338 (Attached Fig. 3a, b). This finding is in line with the previous reports<sup>6</sup>. We briefly  
339 discussed the potential mechanisms in the revision (Discussion section: Page 17, Line  
340 430-438) as: Elevated serum LCA may cause the liver to produce inflammatory  
341 cytokines and impair the BBB, leading to neuroinflammation in the brain. In addition,  
342 the upregulation of serum LCA was positively correlated with the phosphorylation of  
343 PI3K and AKT in the cortical samples. Previous studies have shown that  
344 phosphorylation of PI3K/Akt plays an essential role in microglial activation by  
345 stimulating NF- $\kappa$ B activity<sup>7</sup>, following with the increase of inflammatory cytokines  
346 release<sup>8-9</sup>. Therefore, we speculate that the inflammatory factors increase in peripheral

347 induced by LCA disrupts the blood-brain barrier, and the neuroinflammation increased  
348 in the brain induced by LCA causes the brain to produce more inflammatory factors  
349 into the blood, finally resulting inflammatory cascading response.

350

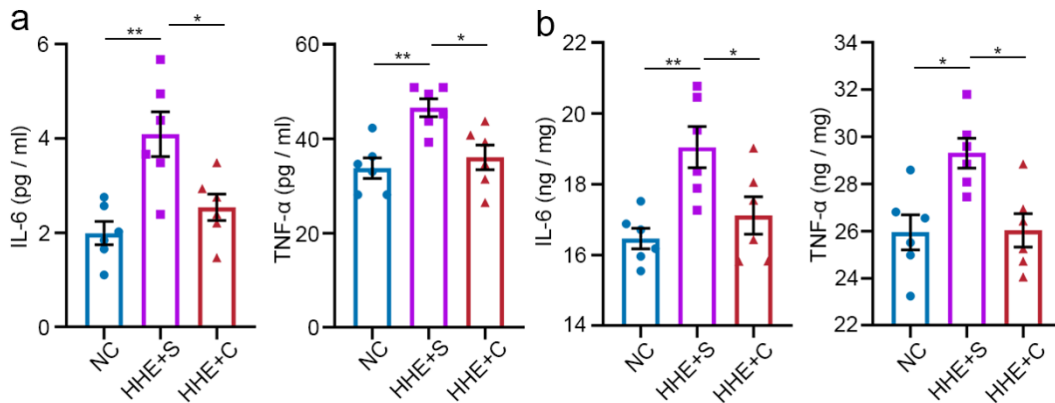

351

352 **Attached Fig. 3. Colestyramine treatment inhibits elevation of TNF- $\alpha$  and IL-6 in**  
353 **the HHE group.** Mice in the HHE group were treated with colestyramine (the HHE+C  
354 group) or saline (the HHE+S group), and blood and cortical samples were collected for  
355 ELISA. The samples from the NC group were used as the reference. In the serum, the  
356 expression of TNF- $\alpha$  and IL-6 was higher in the HHE+S group than the NC group and  
357 the HHE+C group (a), and the similar changes were found in the cortical samples (b).  
358 \*,  $P < 0.05$ ; \*\*,  $P < 0.01$ ; one-way ANOVA and Tukey's multiple comparisons test;  $n = 6$   
359 mice/group.

360

361 ● **Point 7: Although it is understood that the source of lithocholic acid is in the**  
362 **gut and that *L. murinus* are responsible for lithocholic acid synthesis, the**  
363 **mechanism for the inverse correlation between blood and fecal lithocholic acid in**  
364 **Fig 6 is not understood. If barrier disruption is the only reason, then all other**  
365 **metabolites would also increase in blood. The mechanism by which secondary bile**  
366 **acid metabolites, including lithocholic acid, characteristically increase in blood**  
367 **needs to be discussed.**

368

369 **Response:** We found an inverse change of LCA levels in the serum and fecal samples  
370 after *L. murinus* treatment of mice in the HHE group (see Fig. 6c, d). LCA is one  
371 unconjugated bile acid and enters the blood through passive absorption in the colon,  
372 and the absorption is highly dependent on the impermeability of the intestinal barrier<sup>10</sup>.  
373 HHE-induced gut microbiota dysbiosis (e.g., *L. murinus* decrease) could impair the  
374 permeability of the intestinal barrier allowing more passive absorption of bile acids  
375 such as LCA into serum<sup>11</sup>, which subsequently resulted in the decrease of LCA excretion  
376 in the fecal samples. After *L. murinus* treatment, the permeability of the intestinal  
377 barrier was reduced; LCA absorption into blood was decreased and LCA excretion in  
378 fecal samples was increased. In line with this, we found that the abundance of *L.*  
379 *murinus* was negatively correlated with LCA concentration in serum (Fig. 2l). We added  
380 a brief explanation to the revision (Discussion section: Page 16, Line 408-415).

381 In addition to LCA, other secondary bile acids were also upregulated in serum such  
382 as taurochenodesoxycholic acid, glycocholic acid, taurodeoxycholic acid, taurine- $\alpha$ -  
383 ratcholate sodium salt, and taurocholic acid in the HHE group compared to the NC  
384 group (Fig. 2j). Among them, LCA is a monohydroxylated secondary bile acid formed  
385 from the primary bile acid CDCA and is one of the most hydrophobic natural bile acids<sup>12</sup>.  
386 Hydrophobic nature of bile acids allows them to enter cells through sodium-  
387 independent transporter and passive diffusion<sup>13-14</sup>, and this confers LCA with  
388 predominance to enter the blood. Our study demonstrated that elevated LCA played a  
389 critical role in causing the abnormalities in the HHE group. We added a brief  
390 explanation to the revision (Discussion section: Page 17, Line 419-427)

391

392

### 393 **References**

- 394 1. Zhao, Q.; Dai, M. Y.; Huang, R. Y.; Duan, J. Y.; Zhang, T.; Bao, W. M.; Zhang, J.  
395 Y.; Gui, S. Q.; Xia, S. M.; Dai, C. T.; Tang, Y. M.; Gonzalez, F. J.; Li, F., Parabacteroides  
396 distasonis ameliorates hepatic fibrosis potentially via modulating intestinal bile acid



- 397 metabolism and hepatocyte pyroptosis in male mice. *Nat Commun.* **14** (1), 1829 (2023).
- 398 2. Li, L. F.; Zou, H. W.; Song, B. L.; Wang, Y.; Jiang, Y.; Li, Z. L.; Niu, Q. H.; Liu, Y.  
399 J., Increased Lactobacillus Abundance Contributes to Stress Resilience in Mice  
400 Exposed to Chronic Social Defeat Stress. *Neuroendocrinology.* **113** (5), 563-576 (2023).
- 401 3. Jukes, C. A.; Ijaz, U. Z.; Buckley, A.; Spencer, J.; Irvine, J.; Candlish, D.; Li, J. V.;  
402 Marchesi, J. R.; Douce, G., Bile salt metabolism is not the only factor contributing to  
403 Clostridioides (Clostridium) difficile disease severity in the murine model of disease.  
404 *Gut Microbes.* **11** (3), 481-496 (2020).
- 405 4. Holtmann, T. M.; Inzaugarat, M. E.; Knorr, J.; Geisler, L.; Schulz, M.; Bieghs, V.;  
406 Frissen, M.; Feldstein, A. E.; Tacke, F.; Trautwein, C.; Wree, A., Bile Acids Activate  
407 NLRP3 Inflammasome, Promoting Murine Liver Inflammation or Fibrosis in a Cell  
408 Type-Specific Manner. *Cells.* **10** (10) (2021).
- 409 5. MahmoudianDehkordi, S.; Bhattacharyya, S.; Brydges, C. R.; Jia, W.; Fiehn, O.;  
410 Rush, A. J.; Dunlop, B. W.; Kaddurah-Daouk, R., Gut Microbiome-Linked Metabolites  
411 in the Pathobiology of Major Depression With or Without Anxiety-A Role for Bile  
412 Acids. *Front Neurosci.* **16**, 937906 (2022).
- 413 6. McMillin, M.; Frampton, G.; Grant, S.; Khan, S.; Diocares, J.; Petrescu, A.; Wyatt,  
414 A.; Kain, J.; Jefferson, B.; DeMorrow, S., Bile Acid-Mediated Sphingosine-1-  
415 Phosphate Receptor 2 Signaling Promotes Neuroinflammation during Hepatic  
416 Encephalopathy in Mice. *Frontiers in cellular neuroscience.* **11**, 191 (2017).
- 417 7. Jayasooriya, R. G.; Lee, K. T.; Kang, C. H.; Dilshara, M. G.; Lee, H. J.; Choi, Y.  
418 H.; Choi, I. W.; Kim, G. Y., Isobutyrylshikonin inhibits lipopolysaccharide-induced  
419 nitric oxide and prostaglandin E2 production in BV2 microglial cells by suppressing  
420 the PI3K/Akt-mediated nuclear transcription factor- $\kappa$ B pathway. *Nutrition research*  
421 *(New York, N.Y.).* **34** (12), 1111-9 (2014).
- 422 8. Cianciulli, A.; Calvello, R.; Porro, C.; Trotta, T.; Salvatore, R.; Panaro, M. A.,  
423 PI3k/Akt signalling pathway plays a crucial role in the anti-inflammatory effects of

424 curcumin in LPS-activated microglia. *International immunopharmacology*. **36**, 282-  
425 290 (2016).

426 9. Tarassishin, L.; Suh, H. S.; Lee, S. C., Interferon regulatory factor 3 plays an anti-  
427 inflammatory role in microglia by activating the PI3K/Akt pathway. *Journal of*  
428 *neuroinflammation*. **8**, 187 (2011).

429 10. Lennernäs, H., Intestinal permeability and its relevance for absorption and  
430 elimination. *Xenobiotica; the fate of foreign compounds in biological systems*. **37** (10-  
431 11), 1015-51 (2007).

432 11. Collins, S. L.; Stine, J. G.; Bisanz, J. E.; Okafor, C. D.; Patterson, A. D., Bile acids  
433 and the gut microbiota: metabolic interactions and impacts on disease. *Nature reviews*.  
434 *Microbiology*. **21** (4), 236-247 (2023).

435 12. Lucangioli, S. E.; Carducci, C. N.; Tripodi, V. P.; Kenndler, E., Retention of bile  
436 salts in micellar electrokinetic chromatography: relation of capacity factor to octanol-  
437 water partition coefficient and critical micellar concentration. *Journal of*  
438 *chromatography. B, Biomedical sciences and applications*. **765** (2), 113-20 (2001).

439 13. Van Dyke, R. W.; Stephens, J. E.; Scharschmidt, B. F., Bile acid transport in  
440 cultured rat hepatocytes. *The American journal of physiology* 1982, **243** (6), G484-92.

441 14. Aldini, R.; Roda, A.; Montagnani, M.; Cerrè, C.; Pellicciari, R.; Roda, E.,  
442 Relationship between structure and intestinal absorption of bile acids with a steroid or  
443 side-chain modification. *Steroids*. **61** (10), 590-7 (1996).

444



## REVIEWERS' COMMENTS

Reviewer #1 (Remarks to the Author):

The authors have been very responsive to the initial recommendations. This includes the addition of new experimental data which supports the main thrust of the original paper. I have no further comments.

Reviewer #2 (Remarks to the Author):

My comments are appropriately addressed, thus I have no further remarks.
